# Supplementary material
Source: publisher figshare collection journal article supplement (https://tandf.figshare.com/articles/dataset/_/24902615)
Supplement: Supplementary file 1 [file 43822682]

## Supplementary Information

**Journal:** *Expert review of Clinical Pharmacology*

### **Insights into the Population Pharmacokinetics and Pharmacodynamics of Quetiapine: A Systematic Review**

Lu Han<sup>1,†</sup>, Jia-Qin Gu<sup>1,†</sup>, Jue-Hui Mao<sup>1,2</sup>, Xiao-Qin Liu<sup>1</sup>, and Zheng Jiao<sup>1,\*</sup>

<sup>1</sup> Department of Pharmacy, Shanghai Chest Hospital, Shanghai Jiao Tong University School of Medicine, Shanghai, China.

<sup>2</sup> School of Basic Medicine and Clinical Pharmacy, China Pharmaceutical University, Nanjing, China.

<sup>†</sup> Lu Han and Jia-Qin Gu made equal contributions to this work.

#### **\* Corresponding author:**

Zheng Jiao, Professor

Department of Pharmacy, Shanghai Chest Hospital, Shanghai Jiao Tong University School of Medicine, Shanghai, China, 2000030

mail: [jjiaozen@online.sh.cn](mailto:jjiaozen@online.sh.cn)

**Table S1. The description of operational criteria for each of the items**

| Items                                | Suggested contents                                                                                                                                                                                                                    |
|--------------------------------------|---------------------------------------------------------------------------------------------------------------------------------------------------------------------------------------------------------------------------------------|
| <b>Title/abstract</b>                |                                                                                                                                                                                                                                       |
| Name of the drug(s) studied          | The abstract includes the name of the drug(s) studied;                                                                                                                                                                                |
| Population studied                   | The abstract includes population in whom it was studied;                                                                                                                                                                              |
| Primary objective                    | The abstract includes the results of the primary objective;                                                                                                                                                                           |
| Major findings                       | The abstract includes the major clinical pharmacokinetic findings;                                                                                                                                                                    |
| <b>Background</b>                    |                                                                                                                                                                                                                                       |
| Pharmacokinetic data                 | Pharmacokinetic data (i.e. absorption, distribution, metabolism, excretion) that are known and relevant to the drugs being studied are described;                                                                                     |
| Study rationale                      | An explanation of the study rationale is provided;                                                                                                                                                                                    |
| <b>Methods</b>                       |                                                                                                                                                                                                                                       |
| Eligibility criteria                 | Eligibility criteria of study participants are described;                                                                                                                                                                             |
| Co-administration or food            | Co-administration (or lack) of study drug(s) with other potentially interacting drugs or food within this study is described                                                                                                          |
| Dosing                               | Drug preparation and administration characteristics, including dose or frequency are described;                                                                                                                                       |
| Formulation                          | Drug preparation and administration characteristics, including formulation or route are described;                                                                                                                                    |
| Sampling schedule                    | Body fluid or tissue sampling (timing, frequency, and storage) for quantitative drug measurement are described                                                                                                                        |
| Bioanalytical methods                | Validation of quantitative bioanalytical methods used in the study are referenced or described if applicable                                                                                                                          |
| Methods for handling missing data    | Methods for handling missing data such as drug concentrations below the LLOQ should also be described.                                                                                                                                |
| Modeling software                    | Pharmacokinetic modeling software used is described                                                                                                                                                                                   |
| Statistical methods and software     | Statistical methods, including software used, are described                                                                                                                                                                           |
| Candidate structural models          | Pharmacokinetic modeling methods used is described, including assumptions made regarding the number of compartments and order of kinetics (zero, first, or mixed order)                                                               |
| Residual error structure             | The assumptions of the distributions of the residual error structure (e.g. additive, proportional, etc.) Should be described;                                                                                                         |
| Methods for base model determination | The structural model determinate should be justified on the grounds of biology, drug mechanism, prior literature, etc.                                                                                                                |
| Methods for base model evaluation    | Standard goodness-of-fit plots were generated to evaluate the base model, such as observed concentrations versus population and individual predictions, histograms of subject-specific random effects, visual predictive checks, etc. |
| Covariates analysis strategy         | Covariates incorporated into pharmacokinetic models are identified and described                                                                                                                                                      |

**Table S1 (continued)**

---

|                                                                   |                                                                                                                                                                                                                                              |
|-------------------------------------------------------------------|----------------------------------------------------------------------------------------------------------------------------------------------------------------------------------------------------------------------------------------------|
| Methods for final model evaluation                                | Standard goodness-of-fit plots were generated to evaluate the base model, such as observed concentrations versus population and individual predictions, histograms of subject-specific random effects, visual predictive checks (vpcs), etc. |
| Distribution of individual model parameters                       | The assumptions of the distributions of individual model parameters (e.g. lognormal) should be described;                                                                                                                                    |
| Estimation method(s) used                                         | Pharmacokinetic modeling estimation method used is described, such as FOCE-I.                                                                                                                                                                |
| <b>Results</b>                                                    |                                                                                                                                                                                                                                              |
| Population characteristic                                         | A table of summary clinical variables of subjects;                                                                                                                                                                                           |
| No. of subjects and observations                                  | A table of summary statistics of subject demographics;                                                                                                                                                                                       |
| Schematic of the final model                                      | A schematic of the final structural model to characterize the drug absorption, distribution and elimination for complicate model                                                                                                             |
| Table of the final model parameters                               | All final model parameter estimates should be listed in a table.                                                                                                                                                                             |
| Final model evaluation plots                                      | Including observed concentrations versus population and individual predictions, histograms of subject-specific random effects, visual predictive checks (vpcs), etc.                                                                         |
| Summary of the model-building process and the derived final model | Including the results from the best base model, univariate covariate analysis, covariate selection (pivotal steps) and the final model                                                                                                       |
| Plot of concentrations vs. Time and/or effects vs. Concentrations | A plot of drug concentrations versus time in all subjects is displayed to understand choices for candidate structural models;                                                                                                                |
| <b>Discussion/conclusion</b>                                      |                                                                                                                                                                                                                                              |
| Study limitations                                                 | Study limitations describing potential sources of bias and imprecision, where relevant, should be described;                                                                                                                                 |
| Study findings                                                    | The relevance of study findings (applicability, external validity) is described;                                                                                                                                                             |

---

Abbreviations: LLOQ, lower limit of quantitation; FOCE-I, first-order conditional estimation method with the interaction.

**Table S2. Search Strategies**

| <b>PUBMED (Inception to March 31, 2023), Total: 93</b> |                                                                          |        |
|--------------------------------------------------------|--------------------------------------------------------------------------|--------|
| 1                                                      | Quetiapine                                                               | 5891   |
| 2                                                      | Seroquel                                                                 | 5930   |
| 3                                                      | ICI 204,636                                                              | 3191   |
| 4                                                      | ICI-204636                                                               | 3187   |
| 5                                                      | ICI204636                                                                | 3187   |
| 6                                                      | ICI 204636                                                               | 3187   |
| 7                                                      | 1 or 2 or 3 or 4 or 5 or 6                                               | 5931   |
| 8                                                      | population pharmacokinetic                                               | 38004  |
| 9                                                      | population pharmacokinetic / pharmacodynamic                             | 29050  |
| 10                                                     | pharmacokinetic model                                                    | 146056 |
| 11                                                     | nonlinear mixed effect model                                             | 5284   |
| 12                                                     | NONMEM                                                                   | 2812   |
| 13                                                     | WinNonMix                                                                | 11     |
| 14                                                     | P-PHARM                                                                  | 58     |
| 15                                                     | NLMIXED                                                                  | 111    |
| 16                                                     | NLME                                                                     | 221    |
| 17                                                     | MONOLIX                                                                  | 203    |
| 18                                                     | MwPHARM                                                                  | 30     |
| 19                                                     | Pmetrics                                                                 | 144    |
| 20                                                     | USC*PACK                                                                 | 30     |
| 21                                                     | 8 or 9 or 10 or 11 or 12 or 13 or 14 or 15 or 16 or 17 or 18 or 19 or 20 | 170879 |
| 22                                                     | 7 and 21 (121) limited to human (95) published in English (119)          | 93     |

**Table S2 (continued)**

| EMBASE (Inception to March 31, 2023), Total: 168 |                                                                          |        |
|--------------------------------------------------|--------------------------------------------------------------------------|--------|
| 1                                                | Quetiapine                                                               | 28289  |
| 2                                                | Seroquel                                                                 | 1777   |
| 3                                                | ICI 204,636                                                              | 29     |
| 4                                                | ICI-204636                                                               | 63     |
| 5                                                | ICI204636                                                                | 2      |
| 6                                                | ICI 204636                                                               | 63     |
| 7                                                | 1 or 2 or 3 or 4 or 5 or 6                                               | 28309  |
| 8                                                | population pharmacokinetic*                                              | 51918  |
| 9                                                | population pharmacokinetic and pharmacodynamic*                          | 6607   |
| 10                                               | Pharmacokinetic* model*                                                  | 177736 |
| 11                                               | nonlinear mixed effect model*                                            | 3911   |
| 12                                               | NONMEM                                                                   | 5202   |
| 13                                               | WinNonMix                                                                | 16     |
| 14                                               | P-PHARM                                                                  | 85     |
| 15                                               | NLMIXED                                                                  | 133    |
| 16                                               | NLME                                                                     | 883    |
| 17                                               | MONOLIX                                                                  | 476    |
| 18                                               | MwPHARM                                                                  | 78     |
| 19                                               | Pmetrics                                                                 | 238    |
| 20                                               | USC*PACK                                                                 | 26     |
| 21                                               | 8 or 9 or 10 or 11 or 12 or 13 or 14 or 15 or 16 or 17 or 18 or 19 or 20 | 211703 |
| 22                                               | 7 and 21 (494) limited to human (438) limited to article (206)           | 168    |

**Table S2 (continued)**

| WEB OF SCIENCE (Inception to March 31, 2023), Total:170 |                                                                                         |        |
|---------------------------------------------------------|-----------------------------------------------------------------------------------------|--------|
| 1                                                       | Quetiapine                                                                              | 11337  |
| 2                                                       | Seroquel                                                                                | 521    |
| 3                                                       | ICI 204,636                                                                             | 81     |
| 4                                                       | ICI-204636                                                                              | 15     |
| 5                                                       | ICI204636                                                                               | 0      |
| 6                                                       | ICI 204636                                                                              | 15     |
| 7                                                       | 1 or 2 or 3 or 4 or 5 or 6                                                              | 11526  |
| 8                                                       | population pharmacokinetic*                                                             | 47824  |
| 9                                                       | population pharmacokinetic and pharmacodynamic*                                         | 14634  |
| 10                                                      | Pharmacokinetic* model*                                                                 | 174058 |
| 11                                                      | nonlinear mixed effect model*                                                           | 14435  |
| 12                                                      | NONMEM                                                                                  | 4102   |
| 13                                                      | WinNonMix                                                                               | 13     |
| 14                                                      | P-PHARM                                                                                 | 56     |
| 15                                                      | NLMIXED                                                                                 | 210    |
| 16                                                      | NLME                                                                                    | 431    |
| 17                                                      | MONOLIX                                                                                 | 251    |
| 18                                                      | MwPHARM                                                                                 | 28     |
| 19                                                      | Pmetrics                                                                                | 154    |
| 20                                                      | USC*PACK                                                                                | 14     |
| 21                                                      | 8 or 9 or 10 or 11 or 12 or 13 or 14 or 15 or 16 or 17 or 18 or 19 or 20                | 213909 |
| 22                                                      | 7 and 21 (228) exclude animal (192) limited to article (211) published in English (223) | 170    |

**Table S3. List of tested and significant covariates in the included models**

| Study<br>(Publication year) | Ref  | Tested covariates                                                                                                                                                                                                                                                                                                                                                                      | Selection criteria             |                                   | Selected covariates                                                           |     |                       |
|-----------------------------|------|----------------------------------------------------------------------------------------------------------------------------------------------------------------------------------------------------------------------------------------------------------------------------------------------------------------------------------------------------------------------------------------|--------------------------------|-----------------------------------|-------------------------------------------------------------------------------|-----|-----------------------|
|                             |      |                                                                                                                                                                                                                                                                                                                                                                                        | Forward inclusion <sup>f</sup> | Backward elimination <sup>f</sup> | CL/F                                                                          | V/F | F                     |
| Kimko et al. (2000)         | [12] | Age, BW, sex                                                                                                                                                                                                                                                                                                                                                                           | NR                             |                                   | /                                                                             | /   | /                     |
| Isbister et al. (2007)      | [43] | Age, sex, co-activated charcoal, CYP3A4 strong inducer <sup>a</sup> , moderate/weak inhibitor <sup>b</sup> and substrate                                                                                                                                                                                                                                                               | NA <sup>g</sup>                |                                   | co-CYP3A4 strong inducer                                                      | /   | co-activated charcoal |
| Bigos et al. 2010)          | [39] | Age, BW, sex, race, co-bupropion and other medication <sup>c</sup> , smoking status                                                                                                                                                                                                                                                                                                    | P < 0.001                      | NR                                | co-bupropioneh                                                                | BW  | /                     |
| Shilbayeh et al. (2015)     | [45] | Age, body mass index, quetiapine formulation, CYP3A5 (s776746) genotype, ABCB1 (3435CC) genotype, smoking status                                                                                                                                                                                                                                                                       | P < 0.05                       | P < 0.01                          | /                                                                             | /   | /                     |
| Zhou et al. (2015)          | [44] | Age, BW, race, sex, alanine aminotransferase, aspartate aminotransferase, bilirubin                                                                                                                                                                                                                                                                                                    | P < 0.05                       | P < 0.001                         | Age                                                                           | /   | /                     |
| Glatard et al. (2019)       | [40] | Age, BW, quetiapine formulation, sex, BAGE, DAGE, genetic polymorphism of CYP3A4 (rs4646437, rs2740574, rs35599367 i.e CYP3A4*22), CYP3A5 (rs776746), ABCB1 (rs1128503, rs9282564) and POR (rs1057868), albuminemia, co-strong/moderate inducer <sup>d</sup> , CYP3A4 strong/moderate/weak inhibitor <sup>e</sup> , permeability-glycoprotein inhibitors, lithium and grapefruit juice | P < 0.05                       | P < 0.008                         | CYP3A4 (rs35599367) genotype, co-CYP3A4 inhibitor and strong/moderate inducer | /   | /                     |
| Fukushi et al. (2020)       | [46] | Age, BW, sex, $\gamma$ -GTP, alanine aminotransferase, aspartate aminotransferase, bilirubin, albumin, platelets, protein                                                                                                                                                                                                                                                              | P < 0.05                       | P < 0.01                          | $\gamma$ -GTP                                                                 | BW  | /                     |

Abbreviations: BAGE, baseline age; BW, body weight; CL/F, apparent clearance of quetiapine; co, co-administration; DAGE, the age difference from the first concentration to each concentration; F, bioavailability; NA, not applicable; NR, not reported; Ref, reference; V/F, apparent central volume of distribution;  $\gamma$ -GTP,  $\gamma$ -glutamyl transpeptidase.

<sup>a</sup>Strong CYP3A4 inducer is carbamazepine.

<sup>b</sup>Moderate CYP3A4 inhibitor is fluoxetine; weak CYP3A4 inhibitors is fluvoxamine.

<sup>c</sup>Specific medication was not identified.

<sup>d</sup>Strong CYP3A4 inducers were phenytoin, metamizole and carbamazepine; moderate CYP3A4 inducers were oxcarbazepine, bosentan and etravirine.

<sup>e</sup>Strong CYP3A4 inhibitors were amiodarone, atazanavir, darunavir, diltiazem and ritonavir; moderate CYP3A4 inducers were desogestrel, clobazam, fluoxetine and nifedipine; weak CYP3A4 inhibitors was ranitidine.

<sup>f</sup>If the stepwise selection procedure is not implemented, then these aspects should be disregarded.

<sup>g</sup>Clinically significant difference was regarded as a 20% difference in a parameter value.

<sup>h</sup>Significant on CL/F but the magnitude of the effect was not reported.

**Table S4. Simulated quetiapine level based on the included models\*.**

| Compound | Model                   | Ref  | IR QTP 400mg QD      |                      |                       | IR QTP 200mg BID     |                      |                       | ER QTP 400 mg QD     |                      |                       | IR QTP 4000 mg single dose |                   |
|----------|-------------------------|------|----------------------|----------------------|-----------------------|----------------------|----------------------|-----------------------|----------------------|----------------------|-----------------------|----------------------------|-------------------|
|          |                         |      | C <sub>min, ss</sub> | C <sub>max, ss</sub> | AUC <sub>24, ss</sub> | C <sub>min, ss</sub> | C <sub>max, ss</sub> | AUC <sub>24, ss</sub> | C <sub>min, ss</sub> | C <sub>max, ss</sub> | AUC <sub>24, ss</sub> | C <sub>min</sub>           | AUC <sub>24</sub> |
| QTP      | Kimko et al. (2000)     | [12] | 12.5                 | 858.2                | 5438.7                | 40.8                 | 480.8                | 5427.5                | /                    | /                    | /                     | /                          | /                 |
|          | Isbister et al. (2007)  | [43] | /                    | /                    | /                     | /                    | /                    | /                     | /                    | /                    | /                     | 323.5                      | 44323.5           |
|          | Catafau et al. (2008)   | [41] | 3.3                  | /                    | 4230.3                | 30.2                 | /                    | 3972.4                | /                    | /                    | /                     | /                          | /                 |
|          | Bigos et al. (2010)     | [39] | 15.9                 | /                    | 3818.8                | 57.5                 | /                    | 3803.8                | /                    | /                    | /                     | /                          | /                 |
|          | Shilbayeh et al. (2015) | [45] | 4.4                  | 776.8                | 4073.0                | 33.9                 | 429.8                | 3865.03               | /                    | /                    | /                     | /                          | /                 |
|          | Zhou et al. (2015)      | [44] | 39.5                 | 592.7                | 5668.1                | 106.5                | 376.9                | 5551.7                | 76.2                 | 398.9                | 5684.0                | /                          | /                 |
|          | Korell et al. (2018)    | [42] | 19.0                 | 492.1                | 3394.9                | 54.3                 | 282.5                | 3387.0                | 28.4                 | 347.2                | 3386.2                | /                          | /                 |
|          | Glatard et al. (2019)   | [40] | 23.9                 | /                    | 3490.8                | 62.6                 | /                    | 3657.8                | 66.6                 | /                    | 3696.5                | /                          | /                 |
|          | Fukushi et al. (2020)   | [46] | /                    | /                    | /                     | /                    | /                    | /                     | 27.7                 | /                    | 4561.3                | /                          | /                 |
| Median   |                         |      | 15.9                 | 684.8                | 4073.0                | 54.3                 | 403.4                | 3865.0                | 47.5                 | 373.1                | 4128.9                | /                          | /                 |
| QTP-suf  | Korell et al. (2018)    | [42] | 22.0                 | 571.0                | 3923.2                | 64.2                 | 325.8                | 3915.5                | 32.6                 | 399.6                | 3914.0                | /                          | /                 |
| Nor-QTP  | Glatard et al. (2019)   | [40] | 47.7                 | 433.4                | 4697.0                | 101.1                | 276.8                | 4507.6                | 105.6                | 266.2                | 4689.0                | /                          | /                 |

\*Data was simulated based on the reference models and standard virtual patients (40-year-old adult males with a body weight of 70 kg, a cytochrome P450 3A4\*1/\*1 genotype, and a  $\gamma$ -glutamyl transpeptidase value of 19 U/L), C<sub>max, ss</sub> value was not available for studies employed limited sampling strategy.

Abbreviations: AUC<sub>24</sub>, area under the quetiapine plasma concentration-time curve from time zero to 24 hours (ng·h/mL); AUC<sub>24, ss</sub>, steady state area under the plasma concentration-time curve from time zero to 24 hours (ng·h/mL); BID, twice daily, C<sub>max, ss</sub>, steady state peak plasma concentration (ng/mL); C<sub>min</sub>, through plasma concentration, sampled at 24 hours after dose (ng/mL); C<sub>min, ss</sub>, steady state through plasma concentration (ng/mL); ER, extended-release form of quetiapine; IR, immediate-release form of quetiapine; nor-QTP, N-desalkylquetiapine; QD, once daily; QTP, quetiapine; QTP-suf, quetiapine-fumarate; Ref, reference.
